# Supplementary material for: Adherence to the Western, Prudent and Mediterranean Dietary Patterns and Colorectal Cancer Risk: Findings from the Spanish Cohort of the European Prospective Investigation into Cancer and Nutrition (EPIC-Spain)
Source: MDPI journal article supplement (doi:10.3390/nu14153085), 2022-07-27
Supplement: s1 [file s1]

## SUPPLEMENTARY MATERIAL.

**Table S1:** Composition of food groups based on the dietary history questionnaire of the EPIC-Spain study and component loadings obtained with the data of EPIGEICAM study [27].

| FOOD GROUP                  | FOOD <sup>a</sup>                                                                                                                                                                                                                                                                                                                                                                                                                                                                    | West <sup>b</sup> | Prud <sup>b</sup> | Med <sup>b</sup> |
|-----------------------------|--------------------------------------------------------------------------------------------------------------------------------------------------------------------------------------------------------------------------------------------------------------------------------------------------------------------------------------------------------------------------------------------------------------------------------------------------------------------------------------|-------------------|-------------------|------------------|
| HIGH-FAT DAIRY              | Whole-fat milk, milk beverages, curd and yogurt; cream desserts; dairy creams; fraction of unknown fat content dairy <sup>c</sup> .                                                                                                                                                                                                                                                                                                                                                  | 0.60              | -0.11             | 0.20             |
| LOW FAT DAIRY               | Semi-skimmed and skimmed milk, milk beverages, curd and yogurt; Cottage or fresh white cheese. portion of unknown fat content dairy <sup>c</sup> .                                                                                                                                                                                                                                                                                                                                   | -0.49             | 0.60              | -0.01            |
| EGGS                        | Eggs.                                                                                                                                                                                                                                                                                                                                                                                                                                                                                | 0.19              | 0.08              | 0.16             |
| WHITE MEAT                  | Poultry and game.                                                                                                                                                                                                                                                                                                                                                                                                                                                                    | 0.08              | 0.17              | 0.18             |
| RED MEAT                    | Red meat (Pork, beef, veal, lamb, etc.); liver; entrails; hamburgers: meatballs; ground meat; non-specified or mixed meat and derivatives.                                                                                                                                                                                                                                                                                                                                           | 0.27              | 0.09              | 0.22             |
| PROCESSED MEAT              | Serrano ham and other cold meat; bacon; other processed meats; non-specified or mixed processed meat.                                                                                                                                                                                                                                                                                                                                                                                | 0.36              | 0.10              | 0.26             |
| WHITE FISH                  | Fresh or frozen white fish (hake, sea bass, sea bream); 2/3 of processed white fish; ½ of fish eggs; ½ of fish liver; 1/3 of non classified fish and seafood.                                                                                                                                                                                                                                                                                                                        | 0.01              | 0.22              | 0.34             |
| OILY FISH                   | Fresh frozen or processed blue fish (tuna, swordfish, sardines, anchovies, salmon); 2/3 of processed blue fish; ½ of fish eggs; ½ of fish liver; 1/3 of non classified fish and seafood.                                                                                                                                                                                                                                                                                             | 0.05              | 0.24              | 0.44             |
| SEAFOOD/SHELLFISH           | Crustaceans and molluscs; 1/3 of non classified fish and seafood.                                                                                                                                                                                                                                                                                                                                                                                                                    | 0.17              | 0.27              | 0.35             |
| LEAFY VEGETABLES            | Spinach, chard, lettuce and other leafy vegetables.                                                                                                                                                                                                                                                                                                                                                                                                                                  | -0.11             | 0.34              | 0.40             |
| FRUITING VEGETABLES         | Tomato, eggplant, zucchini, cucumber, pepper, artichoke and avocado.                                                                                                                                                                                                                                                                                                                                                                                                                 | 0.00              | 0.36              | 0.45             |
| ROOT VEGETABLES             | Root vegetables such as carrots, turnips, radishes, etc.                                                                                                                                                                                                                                                                                                                                                                                                                             | 0.05              | 0.35              | 0.44             |
| OTHER VEGETABLES            | Cooked cabbage, cauliflower or broccoli, onion, green beans, asparagus, mushrooms, corn, garlic, gazpacho, vegetable soup and other vegetables.<br>Cabbage; mushrooms; grain or pod vegetables; onion and garlic; tail or sprout vegetables; mixed salads or vegetables; non-classified vegetables.                                                                                                                                                                                  | -0.04             | 0.40              | 0.42             |
| LEGUMES                     | Peas, lentils, chickpeas, beans and broad beans                                                                                                                                                                                                                                                                                                                                                                                                                                      | 0.21              | 0.15              | 0.34             |
| POTATOES                    | Potatoes and other tubers.                                                                                                                                                                                                                                                                                                                                                                                                                                                           | 0.17              | 0.25              | 0.40             |
| FRUITS                      | All kind of fruits.                                                                                                                                                                                                                                                                                                                                                                                                                                                                  | -0.07             | 0.31              | 0.31             |
| NUTS                        | Nuts and seeds.                                                                                                                                                                                                                                                                                                                                                                                                                                                                      | 0.18              | 0.22              | 0.29             |
| REFINED GRAINS              | Flour, flakes, starch, semolina flour; pasta, rice, other unspecified or combined grains; pasta; other grains; cereal-based products such as pasta; 1/3 of unspecified or mixed bread, biscuits, cookies; ½ of unspecified bread; White bread; 1/3 of rusks, unspecified cookies; ½ of biscuits, white cookies; ½ of unspecified or combined dough or pastry; bread and pizza dough; 2/3 of unspecified white bread, biscuits, or mixes.                                             | 0.37              | 0.15              | 0.23             |
| WHOLE GRAINS                | Unspecified or combined cereal products: ½ of unspecified bread; non-white bread; breakfast cereals; 1/3 of unspecified or mixed bread, biscuits, biscuits; 2/3 of non-white bread, biscuit, unspecified or mixed biscuits; 1/3 of rusks, unspecified biscuits; ½ of biscuits, not white cookies.                                                                                                                                                                                    | -0.43             | 0.47              | 0.06             |
| OLIVES AND VEGETABLE OIL    | Olives; vegetable oils.                                                                                                                                                                                                                                                                                                                                                                                                                                                              | 0.12              | 0.19              | 0.34             |
| OTHER EDIBLE FATS           | Margarine; butter; oil of marine origin; other animal edible fats.                                                                                                                                                                                                                                                                                                                                                                                                                   | 0.22              | 0.02              | 0.11             |
| SWEETS                      | 1/3 of biscuits, unspecified cookies; ½ of biscuits, white cookies; 1/2 of biscuits, non-white biscuits; ½ of unspecified or combined dough or pastry; cupcakes; 1/3 of unspecified or mixed bread, biscuits, biscuits; 1/3 of white bread, biscotti, cookies not specified or mixed; 1/3 of non-white bread, biscuit, cookies not specified or mixed; chocolate, candy, bar, pasta, confectionery; non-chocolate confectionery, candied fruit; sorbet, water ice; cakes and cookies | 0.35              | 0.18              | 0.05             |
| SUGARY                      | Jam, Honey, Sugar and fruit in sugar syrup.                                                                                                                                                                                                                                                                                                                                                                                                                                          | 0.24              | 0.05              | 0.00             |
| JUICES                      | Vegetable and fruit juices.                                                                                                                                                                                                                                                                                                                                                                                                                                                          | 0.25              | 0.67              | -0.39            |
| CALORIC DRINKS              | Sugar-sweetened soft drinks; unclassified non-alcoholic drinks.                                                                                                                                                                                                                                                                                                                                                                                                                      | 0.74              | 0.21              | -0.25            |
| CONVENIENCE FOOD AND SAUCES | Crackers and snack cookies; Egg derivatives; 1/3 processed white fish; 1/3 processed blue fish; tomato sauces; other/unsorted or mixed sauces; aioli sauces; mayonnaise and other creamy sauces; snacks; non-dairy creams; fried products; ½ condiments and sauces not classified; vegetarian products and dishes; other dietary products.                                                                                                                                           | 0.47              | 0.12              | 0.24             |

<sup>a</sup> Log-transformed centred intake in grams.

<sup>b</sup> West=Western; Prud=Prudent; Med=Mediterranean.

<sup>c</sup> For non-cancer cases: Fraction in high-fat dairy=0.65 of Unknown and Fraction in low-fat dairy=0.35 of Unknown

For breast cancer cases: Fraction in high-fat dairy=0.62 of Unknown and Fraction in low-fat dairy=0.38 of Unknown

For cases of other tumours: Fraction in high-fat dairy=0.68 of Unknown and Fraction in low-fat dairy=0.32 of Unknown

**Figure S1:** Adjusted<sup>a</sup> cumulative incidence for colorectal cancer by quartiles of adherence to the Western, Prudent and Mediterranean dietary patterns and sex.

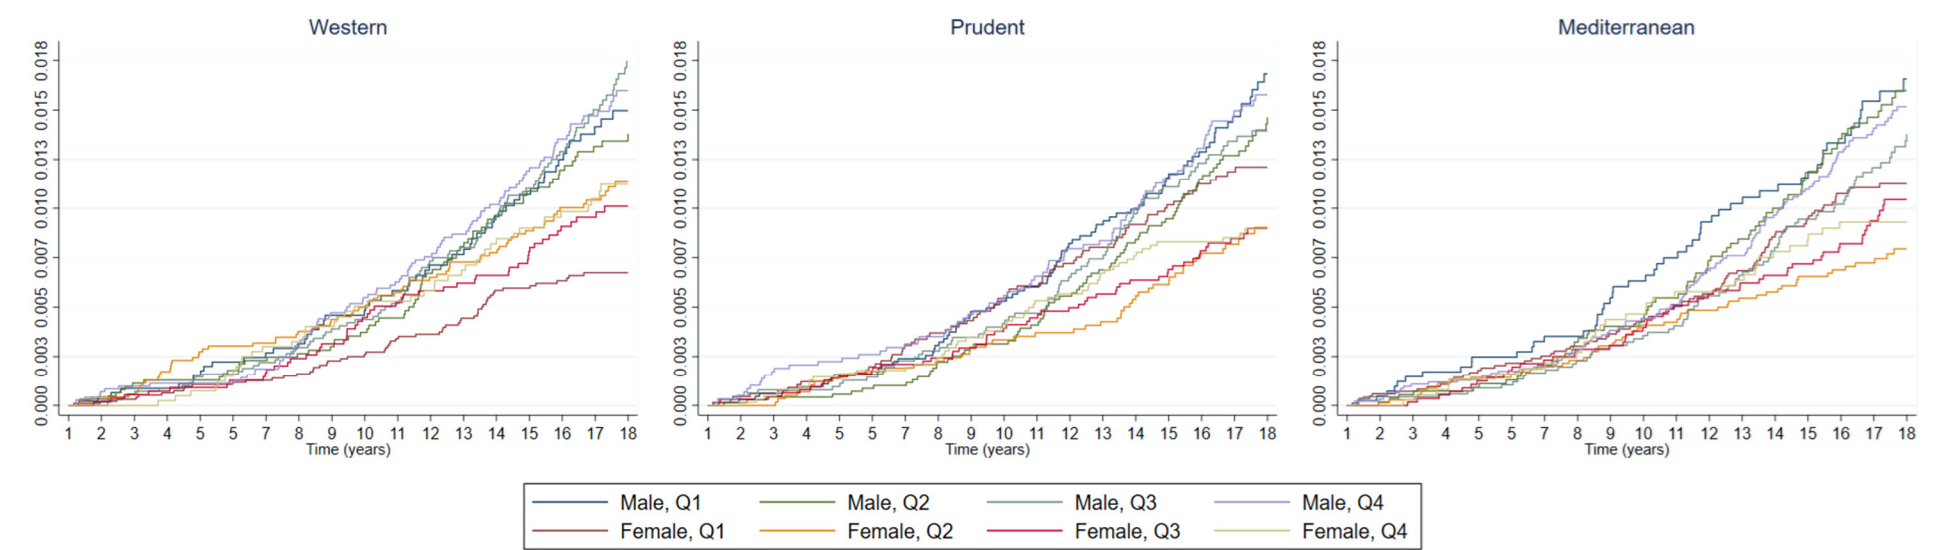

| Year            | 1     | 2     | 3     | 4     | 5     | 6     | 7     | 8     | 9     | 10    | 11    | 12    | 13    | 14    | 15    | 16    | 17    | 18    |
|-----------------|-------|-------|-------|-------|-------|-------|-------|-------|-------|-------|-------|-------|-------|-------|-------|-------|-------|-------|
| Males at risk   | 15096 | 14994 | 14894 | 14785 | 14656 | 14519 | 14372 | 14191 | 13984 | 13810 | 13600 | 13366 | 13112 | 12821 | 12572 | 11599 | 9771  | 7496  |
| Females at risk | 25096 | 25005 | 24896 | 24781 | 24637 | 24507 | 24357 | 24205 | 24030 | 23876 | 23676 | 23501 | 23296 | 23087 | 22867 | 20934 | 17502 | 12492 |

<sup>a</sup> Adjusted by lifetime alcohol intake, smoking habit, energy intake, BMI, physical activity, education, family history of colorectal cancer, age and centre and stratified by sex. For Western dietary pattern, also adjusted by the adherence to the Prudent and Mediterranean dietary patterns. For Prudent and Mediterranean dietary patterns also adjusted by the adherence to the Western dietary pattern.

**Figure S2:** Adjusted<sup>a</sup> cumulative incidence for proximal colon, distal colon and rectal cancer by quartiles of adherence to the Western, Prudent and Mediterranean dietary patterns.

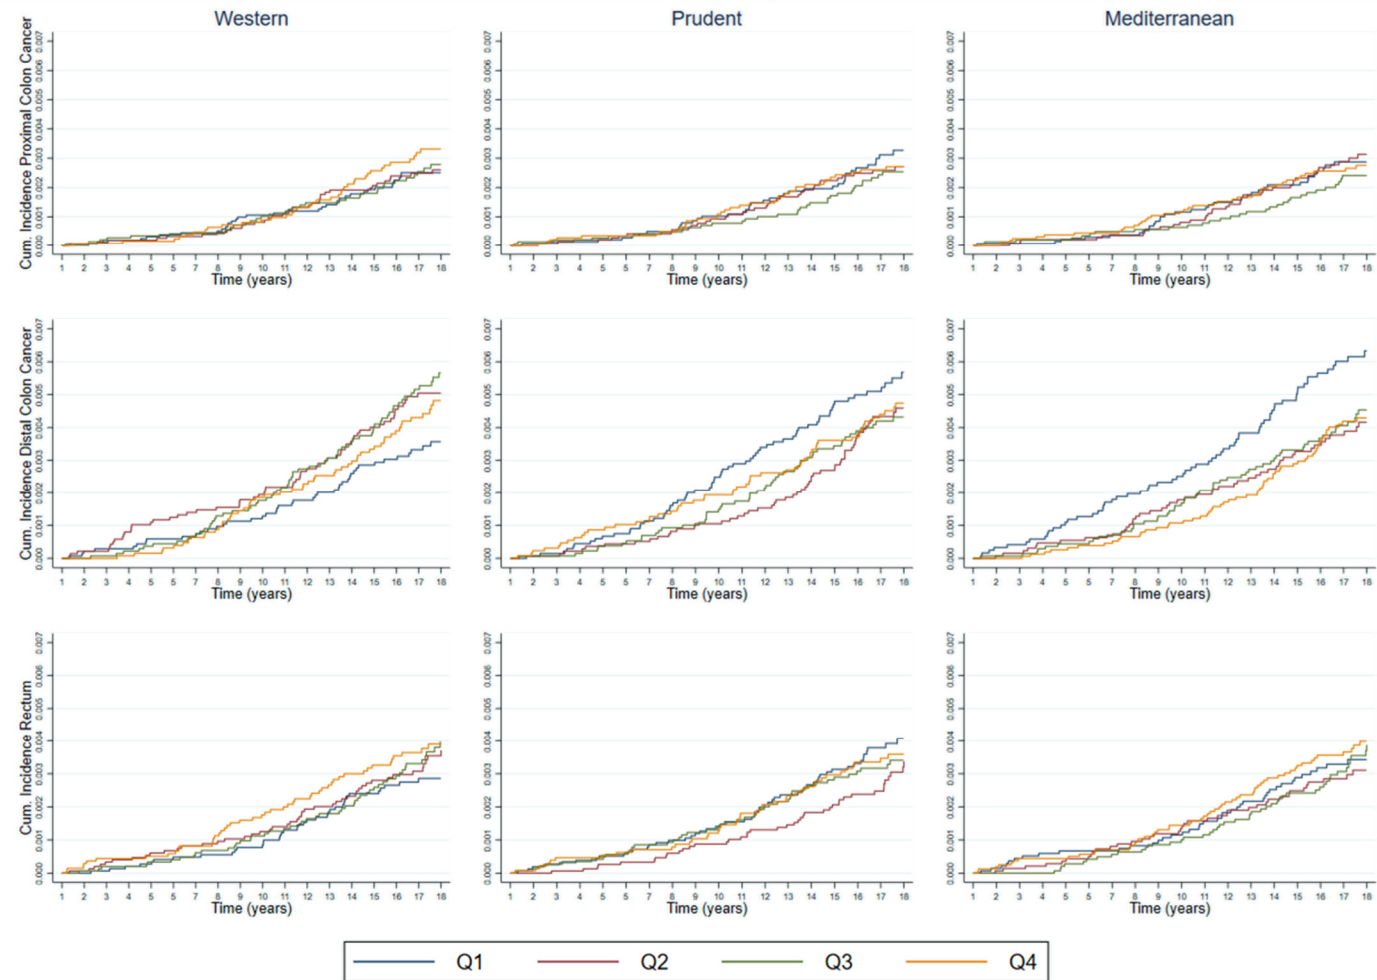

| Year                   | 1     | 2     | 3     | 4     | 5     | 6     | 7     | 8     | 9     | 10    | 11    | 12    | 13    | 14    | 15    | 16    | 17    | 18    |
|------------------------|-------|-------|-------|-------|-------|-------|-------|-------|-------|-------|-------|-------|-------|-------|-------|-------|-------|-------|
| At risk Proximal Colon | 40192 | 39602 | 39404 | 39193 | 38940 | 38683 | 38406 | 38096 | 37742 | 37436 | 37053 | 36682 | 36247 | 35789 | 35353 | 32480 | 27242 | 19983 |
| At risk Distal Colon   | 39869 | 39684 | 39490 | 39271 | 39010 | 38752 | 38469 | 38148 | 37794 | 37485 | 37095 | 36718 | 36282 | 35812 | 35372 | 32494 | 27249 | 19984 |
| At risk Rectum         | 39821 | 39636 | 39435 | 39224 | 38967 | 38708 | 38428 | 38115 | 37761 | 37457 | 37067 | 36691 | 36258 | 35796 | 35355 | 32486 | 27250 | 19983 |

<sup>a</sup> Adjusted by lifetime alcohol intake, smoking habit, energy intake, sex, BMI, physical activity, education, family history of colorectal cancer, age and centre. For Western dietary pattern, also adjusted by the adherence to the Prudent and Mediterranean dietary patterns. For Prudent and Mediterranean dietary patterns also adjusted by the adherence to the Western dietary pattern.

**Figure S3:** Non-linear association between colorectal cancer incidence and scores of adherence to Western, Prudent and Mediterranean dietary patterns for the follow-up period 1-10 years. **By tumour location.**

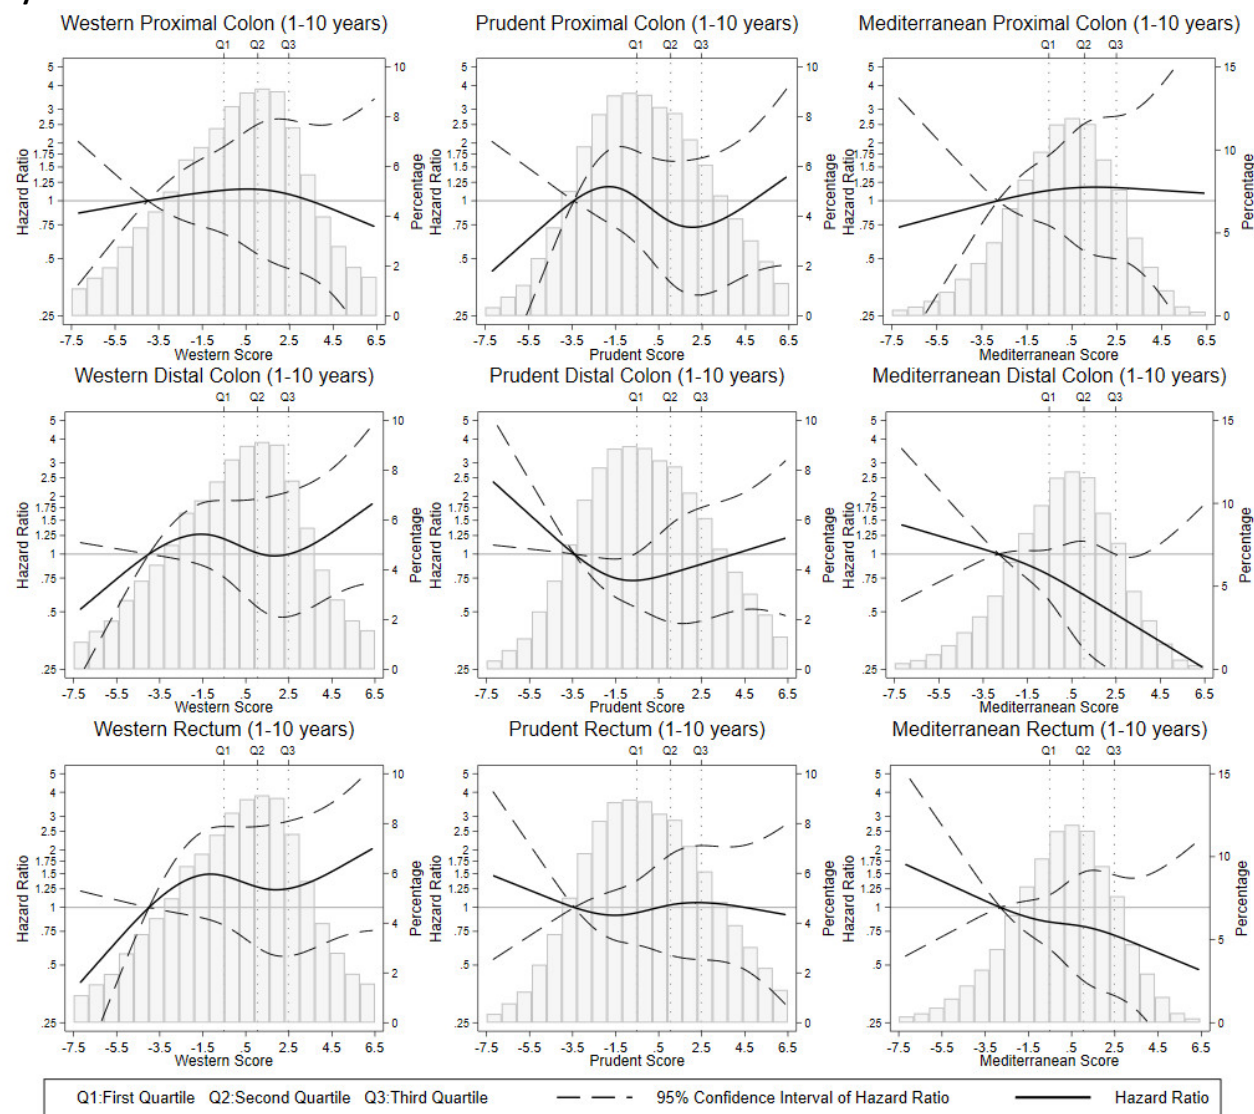

HR of proximal colon, distal colon and rectal cancer stratified by center and age in 5-year periods and adjusted by lifetime alcohol intake, smoking habit, energy intake, BMI, physical activity, education and family history of colorectal cancer. For Western dietary pattern, also adjusted by the adherence to the Prudent and Mediterranean dietary patterns. For Prudent and Mediterranean dietary patterns also adjusted by the adherence to the Western dietary pattern.
